# Supplementary material for: In Silico Prediction of O6-Methylguanine-DNA Methyltransferase Inhibitory Potency of Base Analogs with QSAR and Machine Learning Methods
Source: MDPI journal article supplement (doi:10.3390/molecules23112892), 2018-11-06
Supplement: s1 [file s1]

## Supplementary Materials

### In Silico Prediction of O<sup>6</sup>-Methylguanine-DNA Methyltransferase Inhibitory Potency of Base analogs with QSAR and Machine Learning Methods

Guohui Sun <sup>1,\*</sup>, Tengjiao Fan <sup>1</sup>, Xiaodong Sun <sup>1</sup>, Yuxing Hao <sup>1</sup>, Xin Cui <sup>1</sup>, Lijiao Zhao <sup>1,\*</sup>,  
Ting Ren <sup>1</sup>, Yue Zhou <sup>2</sup>, Rugang Zhong <sup>1</sup> and Yongzhen Peng <sup>3</sup>

- <sup>1</sup> Beijing Key Laboratory of Environmental & Viral Oncology, College of Life Science & Bioengineering, Beijing University of Technology, Beijing 100124, PR China;  
[sunguohui@bjut.edu.cn](mailto:sunguohui@bjut.edu.cn) (G.S.); [fantengjiao2014@emails.bjut.edu.cn](mailto:fantengjiao2014@emails.bjut.edu.cn) (T.F.);  
[sunxd@emails.bjut.edu.cn](mailto:sunxd@emails.bjut.edu.cn) (X.S.); [haoyuxing@emails.bjut.edu.cn](mailto:haoyuxing@emails.bjut.edu.cn) (Y.H.);  
[cuixin1201@emails.bjut.edu.cn](mailto:cuixin1201@emails.bjut.edu.cn) (X.C.); [zhaolijiao@bjut.edu.cn](mailto:zhaolijiao@bjut.edu.cn) (L.J.); [renting@bjut.edu.cn](mailto:renting@bjut.edu.cn) (T.R.);  
[lifesci@bjut.edu.cn](mailto:lifesci@bjut.edu.cn) (R.Z.)
- <sup>2</sup> State Key Laboratory of Bioactive Substances and Functions of Natural Medicines, Institute of Materia Medica, Chinese Academy of Medical Sciences & Peking Union Medical College, 2A Nanwei Road, Beijing 100050, PR China; ; [zhouyue@imm.ac.cn](mailto:zhouyue@imm.ac.cn) (Y.Z.)
- <sup>3</sup> National Engineering Laboratory for Advanced Municipal Wastewater Treatment & Reuse Technology, Engineering Research Center of Beijing, Beijing University of Technology, Beijing 100124, PR China; [pyz@bjut.edu.cn](mailto:pyz@bjut.edu.cn) (Y.P.)

**Corresponding author:** Guohui Sun and Lijiao Zhao

Tel.: +86-10-6739-6180 (G.S.); +86-10-6739-1667 (L.J.)

E-mail address: [sunguohui@bjut.edu.cn](mailto:sunguohui@bjut.edu.cn) (G.S.) and [zhaolijiao@bjut.edu.cn](mailto:zhaolijiao@bjut.edu.cn) (L.J.)

**Figure S1**

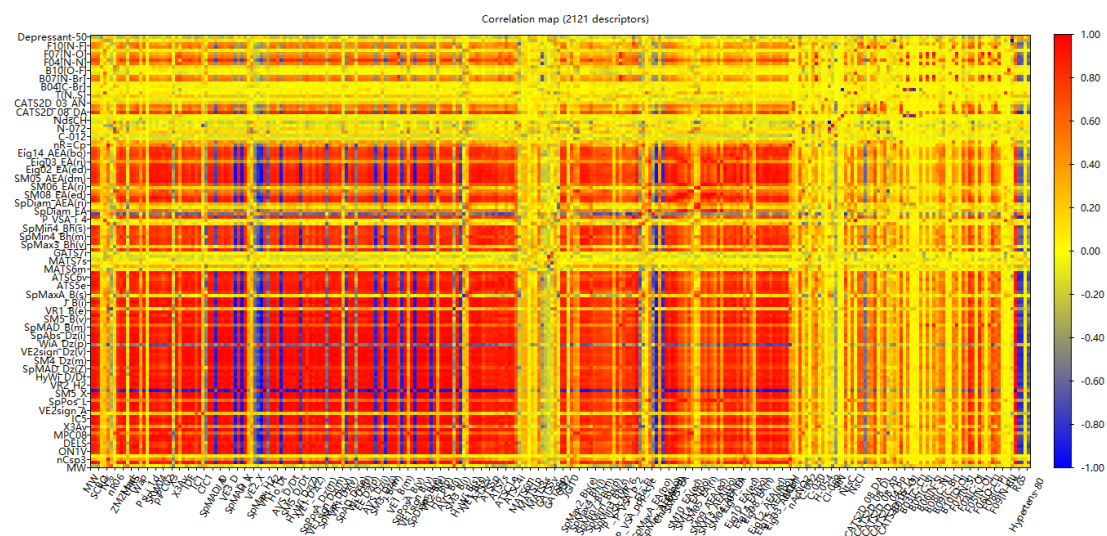

**Figure S1.** Description of correlated descriptors for all compounds in this study.

**Table S2.** Fitting and internal validation parameters of initial QSAR models selected by MCDM.

| Fitting and internal validation parameters |           |                       |                                                       |                     |                               |                              |                              |                    |                               |                             |                              |                                |                                |                                                                                              |                                                                                               |
|--------------------------------------------|-----------|-----------------------|-------------------------------------------------------|---------------------|-------------------------------|------------------------------|------------------------------|--------------------|-------------------------------|-----------------------------|------------------------------|--------------------------------|--------------------------------|----------------------------------------------------------------------------------------------|-----------------------------------------------------------------------------------------------|
| No.                                        | Model No. | Number of descriptors | Descriptors                                           | R <sup>2</sup>      | R <sup>2</sup> <sub>adj</sub> | RMSE <sub>tr</sub>           | CCC <sub>tr</sub>            | F                  | Q <sup>2</sup> <sub>loo</sub> | RMSE <sub>cv</sub>          | CCC <sub>cv</sub>            | R <sup>2</sup> <sub>Yscr</sub> | Q <sup>2</sup> <sub>Yscr</sub> |                                                                                              |                                                                                               |
| 1                                          | 54        | 5                     | J_Dz(p), VE1sign_B(i), GATS1p, JGI4, CATS2D_05_AA     | 0.68                | 0.66                          | 0.87                         | 0.81                         | 32.9383            | 0.6367                        | 0.9338                      | 0.7850                       | 0.0591                         | -0.0978                        |                                                                                              |                                                                                               |
| 2                                          | 56        | 5                     | J_Dz(p), VE3sign_B(s), GATS2m, GATS1p, CATS2D_07_PL   | 0.68                | 0.66                          | 0.88                         | 0.81                         | 32.60              | 0.64                          | 0.93                        | 0.79                         | 0.06                           | -0.10                          |                                                                                              |                                                                                               |
| 3                                          | 58        | 5                     | J_Dz(p), VE3sign_B(s), GATS1p, GATS2p, CATS2D_07_PL   | 0.67                | 0.64                          | 0.89                         | 0.80                         | 31.33              | 0.62                          | 0.94                        | 0.78                         | 0.06                           | -0.10                          |                                                                                              |                                                                                               |
| 4                                          | 59        | 5                     | J_Dz(p), SpMAD_B(m), JGI4, CATS2D_05_AA, CATS2D_07_PL | 0.67                | 0.65                          | 0.89                         | 0.80                         | 31.28              | 0.63                          | 0.94                        | 0.78                         | 0.06                           | -0.10                          |                                                                                              |                                                                                               |
| External validation parameters             |           |                       |                                                       |                     |                               |                              |                              |                    |                               |                             |                              |                                |                                |                                                                                              |                                                                                               |
| No.                                        | Model No. | Number of descriptors | R <sup>2</sup> <sub>ext</sub>                         | RMSE <sub>ext</sub> | Q <sup>2</sup> <sub>F1</sub>  | Q <sup>2</sup> <sub>F2</sub> | Q <sup>2</sup> <sub>F3</sub> | CCC <sub>ext</sub> | MAE <sub>ext</sub>            | r <sup>2</sup> <sub>m</sub> | Δr <sup>2</sup> <sub>m</sub> | k                              | k'                             | (R <sup>2</sup> <sub>ext</sub> - R <sub>0</sub> <sup>2</sup> )/R <sup>2</sup> <sub>ext</sub> | (R <sup>2</sup> <sub>ext</sub> - R' <sub>0</sub> <sup>2</sup> )/R <sup>2</sup> <sub>ext</sub> |
| 1                                          | 54        | 5                     | 0.78                                                  | 0.75                | 0.76                          | 0.76                         | 0.77                         | 0.88               | 0.58                          | 0.69                        | 0.02                         | 0.97                           | 1.01                           | 0.01                                                                                         | 0.02                                                                                          |
| 2                                          | 56        | 5                     | 0.77                                                  | 0.82                | 0.71                          | 0.71                         | 0.72                         | 0.87               | 0.71                          | 0.68                        | 0.19                         | 0.98                           | 0.99                           | 0                                                                                            | 0.08                                                                                          |
| 3                                          | 58        | 5                     | 0.75                                                  | 0.79                | 0.73                          | 0.73                         | 0.74                         | 0.87               | 0.66                          | 0.65                        | 0.01                         | 0.99                           | 0.98                           | 0.03                                                                                         | 0.02                                                                                          |
| 4                                          | 59        | 5                     | 0.73                                                  | 0.90                | 0.65                          | 0.65                         | 0.66                         | 0.85               | 0.75                          | 0.63                        | 0.10                         | 1.02                           | 0.95                           | 0.01                                                                                         | 0.06                                                                                          |

**Table S3.** Fitting and internal validation parameters of further QSAR models selected by MCDM.

| Fitting and internal validation parameters |           |                       |                                                                                                |                     |                               |                              |                              |                    |                               |                             |                              |                                |                                |                                                                                                  |                                                                                                   |
|--------------------------------------------|-----------|-----------------------|------------------------------------------------------------------------------------------------|---------------------|-------------------------------|------------------------------|------------------------------|--------------------|-------------------------------|-----------------------------|------------------------------|--------------------------------|--------------------------------|--------------------------------------------------------------------------------------------------|---------------------------------------------------------------------------------------------------|
| No.                                        | Model No. | Number of descriptors | Descriptors                                                                                    | R <sup>2</sup>      | R <sup>2</sup> <sub>adj</sub> | RMSE <sub>tr</sub>           | CCC <sub>tr</sub>            | F                  | Q <sup>2</sup> <sub>loo</sub> | RMSE <sub>cv</sub>          | CCC <sub>cv</sub>            | R <sup>2</sup> <sub>Yscr</sub> | Q <sup>2</sup> <sub>Yscr</sub> |                                                                                                  |                                                                                                   |
| 1                                          | 4         | 9                     | VE3sign_X, J_Dz(p), SpPosA_B(p),<br>VE3sign_B(s), MATS1i, JGI4, nArNH2, CATS2D_07_DA, B09[C-C] | 0.87                | 0.85                          | 0.53                         | 0.93                         | 44.06              | 0.82                          | 0.62                        | 0.91                         | 0.13                           | -0.22                          |                                                                                                  |                                                                                                   |
| 2                                          | 13        | 9                     | VE3sign_X, J_Dz(p), SpPosA_B(p),<br>VE3sign_B(s), MATS1i, GATS6e, JGI4, B05[N-O], B09[C-C]     | 0.87                | 0.85                          | 0.54                         | 0.93                         | 41.59              | 0.82                          | 0.62                        | 0.90                         | 0.13                           | -0.21                          |                                                                                                  |                                                                                                   |
| 3                                          | 22        | 8                     | VE3sign_X, J_Dz(p), SpPosA_B(p),<br>VE3sign_B(s), MATS1i, JGI4, B09[C-C], F05[N-O]             | 0.85                | 0.83                          | 0.57                         | 0.92                         | 43.01              | 0.81                          | 0.64                        | 0.90                         | 0.12                           | -0.19                          |                                                                                                  |                                                                                                   |
| 4                                          | 23        | 8                     | VE3sign_X, J_Dz(p), SpPosA_B(p),<br>MATS1i, GATS1p, JGI4, CATS2D_07_DA, B09[C-C]               | 0.85                | 0.83                          | 0.57                         | 0.92                         | 42.89              | 0.81                          | 0.64                        | 0.90                         | 0.12                           | -0.18                          |                                                                                                  |                                                                                                   |
| 5                                          | 25        | 8                     | VE3sign_X, J_Dz(p), SpPosA_B(p),<br>VE3sign_B(s), MATS1i, JGI4, B05[N-O], B09[C-C]             | 0.85                | 0.83                          | 0.57                         | 0.92                         | 42.49              | 0.81                          | 0.65                        | 0.90                         | 0.12                           | -0.19                          |                                                                                                  |                                                                                                   |
| External validation parameters             |           |                       |                                                                                                |                     |                               |                              |                              |                    |                               |                             |                              |                                |                                |                                                                                                  |                                                                                                   |
| No.                                        | Model No. | Number of descriptors | R <sup>2</sup> <sub>ext</sub>                                                                  | RMSE <sub>ext</sub> | Q <sup>2</sup> <sub>F1</sub>  | Q <sup>2</sup> <sub>F2</sub> | Q <sup>2</sup> <sub>F3</sub> | CCC <sub>ext</sub> | MAE <sub>ext</sub>            | r <sup>2</sup> <sub>m</sub> | Δr <sup>2</sup> <sub>m</sub> | k                              | k'                             | (R <sup>2</sup> <sub>ext</sub> - R <sup>2</sup> <sub>0</sub> )/<br>R <sup>2</sup> <sub>ext</sub> | (R <sup>2</sup> <sub>ext</sub> - R' <sup>2</sup> <sub>0</sub> )/<br>R <sup>2</sup> <sub>ext</sub> |
| 1                                          | 4         | 9                     | 0.69                                                                                           | 0.79                | 0.67                          | 0.67                         | 0.71                         | 0.83               | 0.70                          | 0.58                        | 0.01                         | 0.99                           | 0.99                           | 0.04                                                                                             | 0.03                                                                                              |
| 2                                          | 13        | 9                     | 0.69                                                                                           | 0.77                | 0.6900                        | 0.69                         | 0.73                         | 0.83               | 0.71                          | 0.57                        | 0.16                         | 0.98                           | 1.00                           | 0.12                                                                                             | 0.004                                                                                             |
| 3                                          | 22        | 8                     | 0.62                                                                                           | 0.85                | 0.62                          | 0.62                         | 0.67                         | 0.78               | 0.75                          | 0.49                        | 0.17                         | 0.99                           | 0.99                           | 0.19                                                                                             | 0.01                                                                                              |
| 4                                          | 23        | 8                     | 0.55                                                                                           | 0.97                | 0.50                          | 0.50                         | 0.57                         | 0.74               | 0.84                          | 0.41                        | 0.05                         | 0.98                           | 0.98                           | 0.16                                                                                             | 0.08                                                                                              |
| 5                                          | 25        | 8                     | 0.59                                                                                           | 0.9048              | 0.57                          | 0.57                         | 0.63                         | 0.77               | 0.81                          | 0.46                        | 0.10                         | 0.98                           | 0.99                           | 0.16                                                                                             | 0.04                                                                                              |

**Table S4.** Statistical description of compounds used in the training and test sets

| <b>Data sets</b>         | <b>Inhibitors</b> | <b>Non-inhibitors</b> | <b>Total</b> |
|--------------------------|-------------------|-----------------------|--------------|
| <b>Training set</b>      | 50                | 54                    | 104          |
| <b>External test set</b> | 12                | 13                    | 25           |
| <b>Total</b>             | 62                | 67                    | 129          |

**Table S6.** Chemical structures and experimental activity values (pIC<sub>50</sub>) of base analogs as MGMT inhibitors.

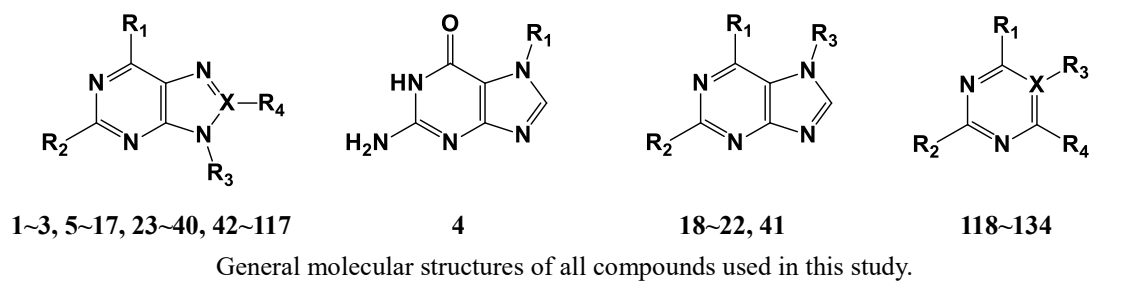

| Comp.             | R <sub>1</sub>                       | R <sub>2</sub>   | R <sub>3</sub>                                          | R <sub>4</sub> | X | pED <sub>50</sub>     |
|-------------------|--------------------------------------|------------------|---------------------------------------------------------|----------------|---|-----------------------|
| 1 <sup>a</sup>    | -OCH <sub>3</sub>                    | -NH <sub>2</sub> | H                                                       | H              | C | 3.46(N <sup>1</sup> ) |
| 2                 |                                      | -NH <sub>2</sub> | H                                                       | H              | C | 6.70(P <sup>2</sup> ) |
| 3                 |                                      | -NH <sub>2</sub> | H                                                       | H              | C | 6.70(P)               |
| 4 <sup>b</sup>    |                                      | /                | /                                                       | /              | / | 3.40(N)               |
| 5                 |                                      | -NH <sub>2</sub> | H                                                       | H              | C | 6.70(P)               |
| 6 <sup>b,c</sup>  |                                      | -NH <sub>2</sub> | H                                                       | H              | C | 6.70(P)               |
| 7 <sup>a</sup>    |                                      | -NH <sub>2</sub> |                                                         | H              | C | 5.70(P)               |
| 8                 |                                      | -NH <sub>2</sub> |                                                         | H              | C | 4.96(N)               |
| 9                 |                                      | -NH <sub>2</sub> |                                                         | H              | C | 5.00(P)               |
| 10 <sup>c</sup>   |                                      | -NH <sub>2</sub> |                                                         | H              | C | 5.05(P)               |
| 11 <sup>a,c</sup> | -OCH <sub>2</sub> CH=CH <sub>2</sub> | -NH <sub>2</sub> | H                                                       | H              | C | 4.70(N)               |
| 12 <sup>c</sup>   |                                      | -NH <sub>2</sub> | -CH <sub>2</sub> COOCH <sub>2</sub> CH <sub>3</sub>     | H              | C | 4.52(N)               |
| 13                |                                      | -NH <sub>2</sub> | -CH <sub>2</sub> COOH                                   | H              | C | 3.80(N)               |
| 14 <sup>b</sup>   |                                      | -NH <sub>2</sub> | -CH <sub>2</sub> C≡CH                                   | H              | C | 4.89(N)               |
| 15 <sup>a</sup>   |                                      | -NH <sub>2</sub> | -CH <sub>2</sub> CONH <sub>2</sub>                      | H              | C | 4.33(N)               |
| 16 <sup>a</sup>   |                                      | -NH <sub>2</sub> | -CH <sub>2</sub> CH(OH)CH <sub>2</sub> -CH <sub>3</sub> | H              | C | 4.89(N)               |
| 17 <sup>a,c</sup> |                                      | H                | H                                                       | H              | C | 4.07(N)               |
| 18                |                                      | -NH <sub>2</sub> | -CH <sub>2</sub> COOCH <sub>2</sub> CH <sub>3</sub>     | /              | / | 3.40(N)               |
| 19                |                                      | -NH <sub>2</sub> | -CH <sub>2</sub> COOH                                   | /              | / | 3.40(N)               |

Table S3. *Cont.*

| Comp.           | R <sub>1</sub> | R <sub>2</sub>       | R <sub>3</sub>                                                              | R <sub>4</sub>   | X | pED <sub>50</sub> |
|-----------------|----------------|----------------------|-----------------------------------------------------------------------------|------------------|---|-------------------|
| 20 <sup>c</sup> |                | -NH <sub>2</sub>     | -CH <sub>2</sub> C≡CH                                                       | /                | / | 3.40(N)           |
| 21 <sup>a</sup> |                | -NH <sub>2</sub>     | -CH <sub>2</sub> CONH <sub>2</sub>                                          | /                | / | 3.40(N)           |
| 22 <sup>b</sup> |                | -NH <sub>2</sub>     | -CH <sub>2</sub> CH(OH)CH <sub>2</sub> CH <sub>3</sub>                      | /                | / | 3.40(N)           |
| 23              |                | -NH <sub>2</sub>     | H                                                                           | H                | C | 3.40(N)           |
| 24 <sup>c</sup> |                | -NH <sub>2</sub>     | H                                                                           | H                | C | 3.40(N)           |
| 25              |                | -NH <sub>2</sub>     |                                                                             | H                | C | 3.40(N)           |
| 26 <sup>a</sup> |                | -NH <sub>2</sub>     | H                                                                           | H                | C | 6.52(P)           |
| 27              |                | -NH <sub>2</sub>     | H                                                                           | H                | C | 6.52(P)           |
| 28 <sup>a</sup> |                | -NH <sub>2</sub>     | H                                                                           | H                | C | 6.30(P)           |
| 29              |                | -NH <sub>2</sub>     | H                                                                           | H                | C | 6.30(P)           |
| 30              |                | -NH <sub>2</sub>     | H                                                                           | H                | C | 5.40(P)           |
| 31 <sup>c</sup> |                | -NH <sub>2</sub>     | H                                                                           | H                | C | 6.52(P)           |
| 32              |                | -NH <sub>2</sub>     | H                                                                           | H                | C | 6.00(P)           |
| 33              |                | -NH <sub>2</sub>     | -COCH <sub>3</sub>                                                          | H                | C | 6.40(P)           |
| 34              |                | -NH <sub>2</sub>     | -CH <sub>3</sub>                                                            | H                | C | 5.59(P)           |
| 35              |                | -NH <sub>2</sub>     | -CH <sub>2</sub> OCOC(CH <sub>3</sub> ) <sub>3</sub>                        | H                | C | 5.51(P)           |
| 36              |                | -NH <sub>2</sub>     | -CH <sub>2</sub> CH(OH)CH <sub>2</sub> Cl                                   | H                | C | 4.74(N)           |
| 37              |                | -NH <sub>2</sub>     | -CH <sub>2</sub> CH(OH)CH <sub>2</sub> NH-CH(CH <sub>3</sub> ) <sub>2</sub> | H                | C | 3.97(N)           |
| 38              |                | -NH <sub>2</sub>     | -CH <sub>2</sub> CH(OH)CH <sub>2</sub> NH-C(CH <sub>3</sub> ) <sub>3</sub>  | H                | C | 3.97(N)           |
| 39 <sup>a</sup> |                | -NH <sub>2</sub>     | -CH <sub>2</sub> CH(OH)CH <sub>2</sub> O-CH(CH <sub>3</sub> ) <sub>2</sub>  | H                | C | 5.15(P)           |
| 40 <sup>b</sup> |                | -NHCOCH <sub>3</sub> | H                                                                           | H                | C | 4.62(N)           |
| 41 <sup>a</sup> |                | -NH <sub>2</sub>     | -CH <sub>3</sub>                                                            | /                | / | 4.28(N)           |
| 42              |                | -NH <sub>2</sub>     | H                                                                           | H                | C | 4.24(N)           |
| 43              |                | -NH <sub>2</sub>     | H                                                                           | H                | C | 3.52(N)           |
| 44              |                | -NH <sub>2</sub>     | H                                                                           | -NH <sub>2</sub> | C | 6.15(P)           |
| 45              |                | -NH <sub>2</sub>     | H                                                                           | -CH <sub>3</sub> | C | 6.52(P)           |
| 46 <sup>b</sup> |                | -NH <sub>2</sub>     | H                                                                           | -OH              | C | 6.52(P)           |

Table S3. *Cont.*

| Comp.             | R <sub>1</sub>                                                            | R <sub>2</sub>                    | R <sub>3</sub> | R <sub>4</sub> | X | pED <sub>50</sub> |
|-------------------|---------------------------------------------------------------------------|-----------------------------------|----------------|----------------|---|-------------------|
| 47 <sup>a,c</sup> |                                                                           | -NH <sub>2</sub>                  | H              | -Br            | C | 7.10(P)           |
| 48                |                                                                           | -NH <sub>2</sub>                  | H              | /              | N | 7.15(P)           |
| 49                |                                                                           | -NH <sub>2</sub>                  | H              | -F             | C | 6.40(P)           |
| 50 <sup>c</sup>   |                                                                           | -OH                               | H              | H              | C | 4.22(N)           |
| 51                |                                                                           | -OH                               | H              | -OH            | C | 4.60(N)           |
| 52 <sup>b</sup>   |                                                                           | -F                                | H              | H              | C | 4.32(N)           |
| 53 <sup>b,c</sup> |                                                                           | -NHCOCH <sub>3</sub>              | H              | -OH            | C | 4.19(N)           |
| 54 <sup>a</sup>   |                                                                           | -NHCH <sub>3</sub>                | H              | H              | C | 3.80(N)           |
| 55 <sup>b</sup>   |                                                                           | -N(CH <sub>3</sub> ) <sub>2</sub> | H              | H              | C | 3.70(N)           |
| 56                |                                                                           | -NH <sub>2</sub>                  | H              | H              | C | 6.82(P)           |
| 57 <sup>b</sup>   |                                                                           | -NH <sub>2</sub>                  | H              | H              | C | 6.96(P)           |
| 58                |                                                                           | -NH <sub>2</sub>                  | H              | H              | C | 4.28(N)           |
| 59 <sup>b</sup>   |                                                                           | -NH <sub>2</sub>                  | H              | H              | C | 3.91(N)           |
| 60 <sup>a,c</sup> |                                                                           | -NH <sub>2</sub>                  | H              | H              | C | 6.77(P)           |
| 61                |                                                                           | -NH <sub>2</sub>                  | H              | H              | C | 3.18(N)           |
| 62                |                                                                           | -NH <sub>2</sub>                  | H              | H              | C | 8.52(N)           |
| 63                | -OCH <sub>2</sub> CH <sub>3</sub>                                         | -NH <sub>2</sub>                  | H              | H              | C | <3.00(N)          |
| 64                | -O(CH <sub>2</sub> ) <sub>2</sub> CH <sub>3</sub>                         | -NH <sub>2</sub>                  | H              | H              | C | <3.00(N)          |
| 65 <sup>a,c</sup> | -O(CH <sub>2</sub> ) <sub>3</sub> CH <sub>3</sub>                         | -NH <sub>2</sub>                  | H              | H              | C | 3.31(N)           |
| 66                | -O(CH <sub>2</sub> ) <sub>2</sub> CH-(CH <sub>3</sub> ) <sub>2</sub>      | -NH <sub>2</sub>                  | H              | H              | C | <3.00(N)          |
| 67                | -O(CH <sub>2</sub> ) <sub>4</sub> CH <sub>3</sub>                         | -NH <sub>2</sub>                  | H              | H              | C | <3.00(N)          |
| 68                | -O(CH <sub>2</sub> ) <sub>5</sub> CH <sub>3</sub>                         | -NH <sub>2</sub>                  | H              | H              | C | 3.26(N)           |
| 69 <sup>c</sup>   | -O(CH <sub>2</sub> ) <sub>6</sub> CH <sub>3</sub>                         | -NH <sub>2</sub>                  | H              | H              | C | 3.30(N)           |
| 70                |                                                                           | -NH <sub>2</sub>                  | H              | H              | C | <3.00(N)          |
| 71                | -OCH <sub>2</sub> CH(=CH <sub>2</sub> )<br>-CH <sub>3</sub>               | -NH <sub>2</sub>                  | H              | H              | C | 4.60(N)           |
| 72                | -O(CH <sub>2</sub> ) <sub>4</sub> CH=CH <sub>2</sub>                      | -NH <sub>2</sub>                  | H              | H              | C | /                 |
| 73                | (Z)-O(CH <sub>2</sub> ) <sub>2</sub> CH=CHCH <sub>2</sub> CH <sub>3</sub> | -NH <sub>2</sub>                  | H              | H              | C | /                 |
| 74 <sup>a</sup>   | (E)-O(CH <sub>2</sub> ) <sub>2</sub> CH=CHCH <sub>2</sub> CH <sub>3</sub> | -NH <sub>2</sub>                  | H              | H              | C | <3.00(N)          |
| 75                | -O(CH <sub>2</sub> ) <sub>2</sub> C≡CCH <sub>2</sub> -CH <sub>3</sub>     | -NH <sub>2</sub>                  | H              | H              | C | /                 |



Table S3. *Cont.*

| Comp.             | R <sub>1</sub>                                                                          | R <sub>2</sub>   | R <sub>3</sub> | R <sub>4</sub> | X | pED <sub>50</sub> |
|-------------------|-----------------------------------------------------------------------------------------|------------------|----------------|----------------|---|-------------------|
| 76                |                                                                                         | -NH <sub>2</sub> | H              | H              | C | 3.26(N)           |
| 77 <sup>c</sup>   | -OCH <sub>2</sub> CH(=CH <sub>2</sub> )-CH <sub>2</sub> CH <sub>3</sub>                 | -NH <sub>2</sub> | H              | H              | C | 4.80(N)           |
| 78                | -OCH <sub>2</sub> CH(=CH <sub>2</sub> )-CH <sub>2</sub> (CH <sub>3</sub> ) <sub>2</sub> | -NH <sub>2</sub> | H              | H              | C | <3.00(N)          |
| 79                | -OCH <sub>2</sub> C(CH <sub>3</sub> )=CHCH <sub>3</sub>                                 | -NH <sub>2</sub> | H              | H              | C | /                 |
| 80                |                                                                                         | -NH <sub>2</sub> | H              | H              | C | 4.11(N)           |
| 81                | -OCH <sub>2</sub> C≡CH                                                                  | -NH <sub>2</sub> | H              | H              | C | 4.70(N)           |
| 82                |                                                                                         | -NH <sub>2</sub> | H              | H              | C | <3.00(N)          |
| 83                |                                                                                         | -NH <sub>2</sub> | H              | H              | C | <3.00(N)          |
| 84                |                                                                                         | -NH <sub>2</sub> | H              | H              | C | <3.00(N)          |
| 85 <sup>a</sup>   |                                                                                         | -NH <sub>2</sub> | H              | H              | C | <3.00(N)          |
| 86                |                                                                                         | -NH <sub>2</sub> | H              | H              | C | /                 |
| 87                |                                                                                         | -NH <sub>2</sub> | H              | H              | C | <3.00(N)          |
| 88 <sup>b</sup>   |                                                                                         | -NH <sub>2</sub> | H              | H              | C | 6.26(P)           |
| 89                |                                                                                         | -NH <sub>2</sub> | H              | H              | C | <3.00(N)          |
| 90                |                                                                                         | -NH <sub>2</sub> | H              | H              | C | <3.00(N)          |
| 91 <sup>b,c</sup> |                                                                                         | -NH <sub>2</sub> | H              | H              | C | 6.41(P)           |
| 92                |                                                                                         | -NH <sub>2</sub> | H              | H              | C | 5.80(P)           |
| 93 <sup>b</sup>   |                                                                                         | -NH <sub>2</sub> | H              | H              | C | 5.59(P)           |
| 94                | -OCH <sub>2</sub> COCH <sub>3</sub>                                                     | -NH <sub>2</sub> | H              | H              | C | 3.72(N)           |
| 95                | -OCH <sub>2</sub> COCH <sub>2</sub> -CH <sub>3</sub>                                    | -NH <sub>2</sub> | H              | H              | C | 3.82(N)           |
| 96                | -OCH <sub>2</sub> COCH(CH <sub>3</sub> ) <sub>2</sub>                                   | -NH <sub>2</sub> | H              | H              | C | <3.00(N)          |
| 97 <sup>a,c</sup> |                                                                                         | -NH <sub>2</sub> | H              | H              | C | <3.00(N)          |
| 98 <sup>b</sup>   |                                                                                         | -NH <sub>2</sub> |                | H              | C | 5.10(P)           |
| 99 <sup>a</sup>   |                                                                                         | -NH <sub>2</sub> |                | H              | C | 6.66(P)           |
| 100               |                                                                                         | -NH <sub>2</sub> |                | H              | C | 6.82(P)           |
| 101               |                                                                                         | -NH <sub>2</sub> |                | H              | C | 6.82(P)           |

Table S3. *Cont.*

| Comp.                                                                       | R <sub>1</sub> | R <sub>2</sub>   | R <sub>3</sub>   | R <sub>4</sub>   | X | pED <sub>50</sub> |
|-----------------------------------------------------------------------------|----------------|------------------|------------------|------------------|---|-------------------|
| 102                                                                         |                | -NH <sub>2</sub> |                  | H                | C | 7.10(P)           |
| 102                                                                         |                | -NH <sub>2</sub> |                  | H                | C | 7.10(P)           |
| 103                                                                         |                | -NH <sub>2</sub> |                  | H                | C | 8.00(P)           |
| 104 <sup>b,c</sup>                                                          |                | -NH <sub>2</sub> |                  | H                | C | 8.00(P)           |
| 105 <sup>a</sup>                                                            |                | -NH <sub>2</sub> |                  | H                | C | 8.00(P)           |
| 106                                                                         |                |                  |                  | H                | C | 4.30(N)           |
| 107 <sup>c</sup>                                                            |                |                  | H                | H                | C | 4.30(N)           |
| 108                                                                         |                | -NH <sub>2</sub> | H                | H                | C | 8.54(P)           |
| ED <sub>50</sub> values of 109–134 were determined on HeLa S3 cell extracts |                |                  |                  |                  |   |                   |
| 109                                                                         |                | -NH <sub>2</sub> | H                | H                | C | P                 |
| 110                                                                         |                | -NH <sub>2</sub> | H                | H                | C | P                 |
| 111                                                                         |                | -NH <sub>2</sub> | H                | H                | C | N                 |
| 112                                                                         |                | -NH <sub>2</sub> | H                | H                | C | P                 |
| 113                                                                         |                | -NH <sub>2</sub> | H                | H                | C | P                 |
| 114                                                                         |                | -NH <sub>2</sub> | H                | H                | C | N                 |
| 115 <sup>c</sup>                                                            |                | -NH <sub>2</sub> | H                | H                | C | P                 |
| 116 <sup>c</sup>                                                            |                | -NH <sub>2</sub> | H                | H                | C | P                 |
| 117 <sup>c</sup>                                                            |                | -NH <sub>2</sub> | H                | H                | C | N                 |
| 118                                                                         |                | H                | -NO <sub>2</sub> | -NH <sub>2</sub> | C | N                 |
| 119                                                                         |                | -NH <sub>2</sub> | H                | -NH <sub>2</sub> | C | N                 |
| 120                                                                         |                | -NH <sub>2</sub> | -NH <sub>2</sub> | -NH <sub>2</sub> | C | P                 |
| 121 <sup>c</sup>                                                            |                | -NH <sub>2</sub> | -NO              | -NH <sub>2</sub> | C | P                 |
| 122                                                                         |                | -NH <sub>2</sub> | -NO <sub>2</sub> | -NH <sub>2</sub> | C | P                 |
| 123 <sup>c</sup>                                                            |                | -NH <sub>2</sub> | -Br              | -NH <sub>2</sub> | C | P                 |

Table S3. *Cont.*

| Comp.            | R <sub>1</sub> | R <sub>2</sub>   | R <sub>3</sub>   | R <sub>4</sub>   | X | pED <sub>50</sub> |
|------------------|----------------|------------------|------------------|------------------|---|-------------------|
| 124              |                | -NH <sub>2</sub> | -NO <sub>2</sub> | H                | C | P                 |
| 125              |                | -NH <sub>2</sub> | -NO <sub>2</sub> | -CH <sub>3</sub> | C | P                 |
| 126 <sup>c</sup> |                | -NH <sub>2</sub> | /                | -NH <sub>2</sub> | N | P                 |
| 127              |                | -NH <sub>2</sub> | -NO <sub>2</sub> | -NH <sub>2</sub> | C | P                 |
| 128              |                | -NH <sub>2</sub> | -NO <sub>2</sub> | -NH <sub>2</sub> | C | P                 |
| 129              |                | -NH <sub>2</sub> | -NO <sub>2</sub> | -NH <sub>2</sub> | C | P                 |
| 130              |                | -NH <sub>2</sub> | -NO <sub>2</sub> | -NH <sub>2</sub> | C | P                 |
| 131              |                | -NH <sub>2</sub> | -NO <sub>2</sub> | -NH <sub>2</sub> | C | P                 |
| 132              |                | -NH <sub>2</sub> | -NO <sub>2</sub> | -NH <sub>2</sub> | C | P                 |
| 133              |                | -NH <sub>2</sub> | -NO              | -NH <sub>2</sub> | C | P                 |
| 134              |                | -NH <sub>2</sub> | -NO              | -NH <sub>2</sub> | C | P                 |

<sup>1</sup> “N” represents MGMT non-inhibitors;<sup>2</sup> “P” represents MGMT inhibitors;<sup>a</sup> Test set in initial QSAR study (Model I);<sup>b</sup> Test set in further QSAR study (Model II);<sup>c</sup> Test set in classification study.
